# Supplementary material
Source: Springer Nature journal article supplement (https://www.springermedizin.de/resource/supplementary/12967_2011_828_MOESM10_ESM.pdf/9577140)

Mki67

Topro-3

V3

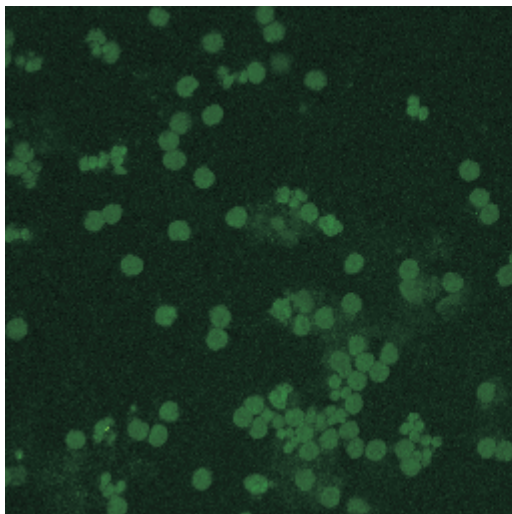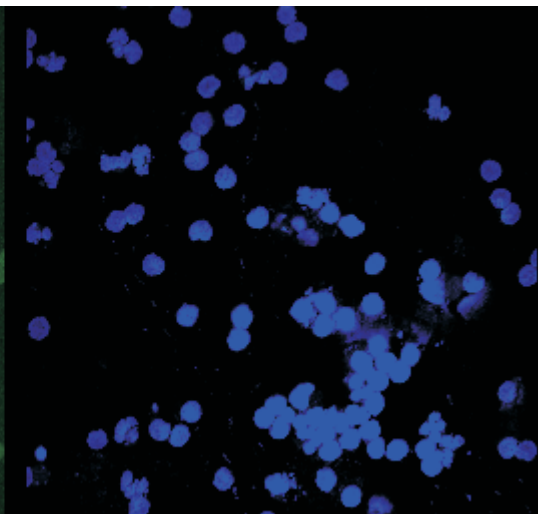

Control

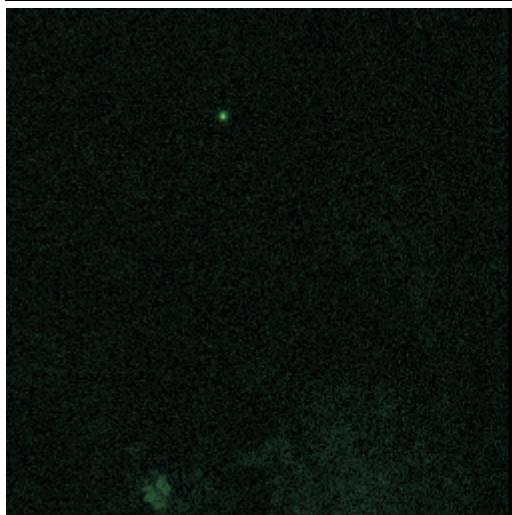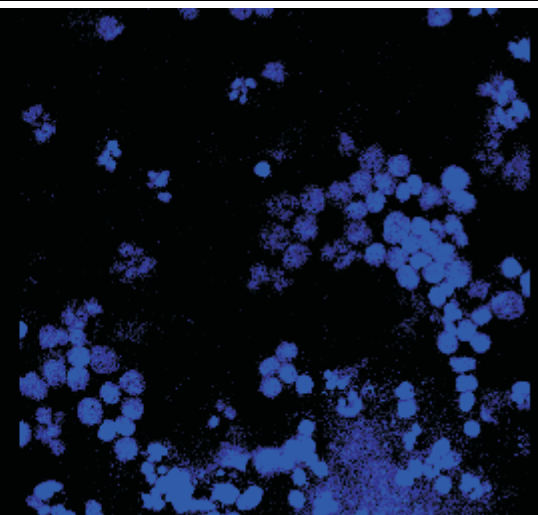

Supplement: MOESM10 [file 9577140]
